# Supplementary material
Source: PubMed Central journal article supplement (PMC1409725)

## Supplementary Material

### Harrington AE et al.: Structural basis for the inhibition of activin signalling by follistatin

Figure 1. **Biochemical and biophysical analysis of R192A mutant of follistatin Fs12 fragment**

A) Analytical size exclusion chromatography on Superdex 75 10/30 column in 100 mM ammonium acetate, 5 mM EDTA, pH 7.0. 200  $\mu$ l of indicated proteins (activin A dimer concentration 50  $\mu$ M, Fs12 fragments 110  $\mu$ M) or protein mixtures were loaded onto the column and eluted at flow rate of 0.8 ml/min.

B) SDS-PAGE analysis of the size exclusion chromatography with Fs12(R192A) mutant and activin A. Activin A (lane 1) and mutant Fs12 protein (lane 2) were mixed together (lane 3), incubated for a few minutes and centrifuged at 15,000 rpm for three minutes to separate soluble protein (lane 4) from precipitated protein (lane 5, only activin A). The soluble fraction (lane 4) was loaded onto Superdex 75 10/30 column. 0.8 ml fractions (one fraction per minute) from 13 minutes onwards are shown in lanes 6-11. Lanes 7 and 8 show only Fs12(R192A) protein (elution peak at 14.8 min), whereas free activin A elutes as a much broader peak at 17.6 minutes, shown in lanes 9-11.

C) Isothermal titration calorimetric analysis of Fs12(R192A) interaction with activin A. 70  $\mu$ M Fs12(R192A) was titrated into 3.7  $\mu$ M activin A in 100 mM Tris-HCl, 5 mM EDTA, 3.2  $\mu$ M BSA, pH 8.0 at 25°C. Raw ITC data on the left panel shows only dilution heats, similar to Fs12 titration into the same buffer in the absence of activin A. Integrated heats after subtraction of dilution heats from control experiment are shown on the right panel. It is clear there is no binding of R192A mutant to activin A under these conditions.

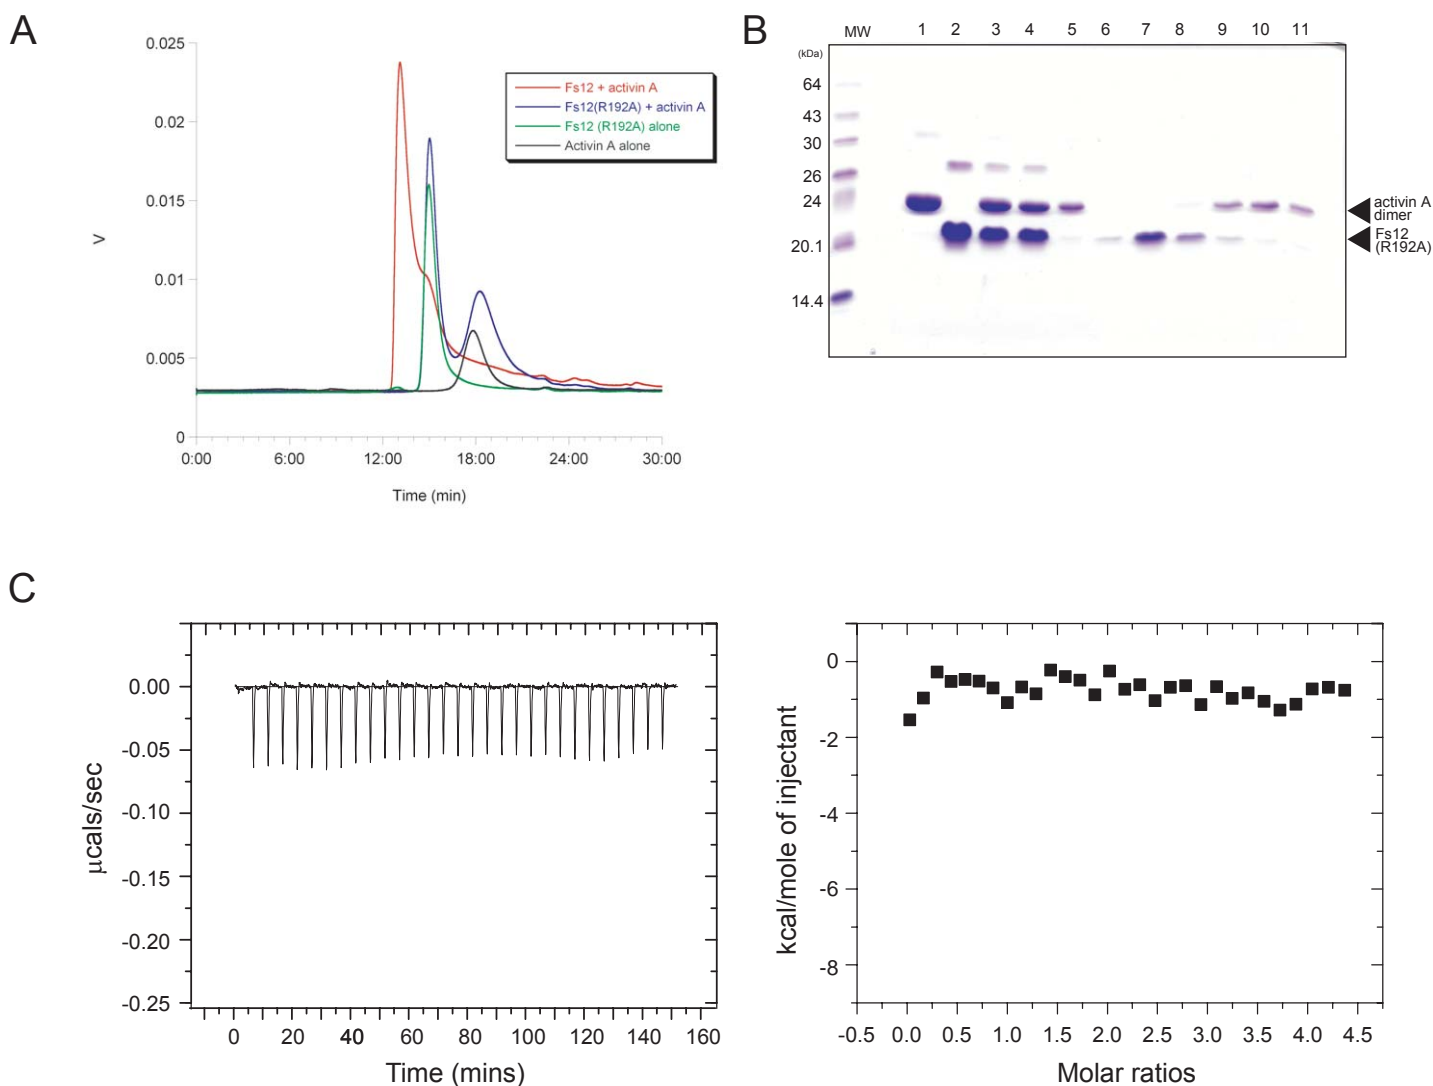

Supplement: 7601000s1.pdf [file 7601000s1.pdf]
